# Supplementary material for: On the complexation of metal cations with “pure” diethylenetriamine-N,N,N′,N′′,N′′-pentakis(methylenephosphonic) acid
Source: Royal Society of Chemistry journal article supplement (doi:10.1039/c7nj00118e), 2017-01-01
Supplement: c7nj00118e1.pdf [file c7nj00118e1.pdf]

**On the Complexation of Metal Cations by “Pure” Diethylenetriamine-N,N,N',N'',N''-Pentakis-  
(Methylenephosphonic) Acid**

**Supplementary Information**

**Table S1.** Experimental chemical shifts for the Zn<sup>2+</sup>/DTPMP system from <sup>1</sup>H- and <sup>31</sup>P-NMR measurements

| pH    | δHa                | δHb  | δHc  | δHd   | δPa    | δPb    |
|-------|--------------------|------|------|-------|--------|--------|
| 1.93  | 3.545              | 3.75 | 3.42 | 3.160 | 9.720  | 15.250 |
| 1.96  | 3.535              | 3.74 | 3.40 | 3.145 | 9.660  | 15.350 |
| 2.14  | 3.525              | 3.73 | n.d. | 3.120 | 9.680  | 15.660 |
| 2.33  | 3.515              | 3.72 | n.d. | 3.085 | 9.670  | 15.950 |
| 2.74  | 3.490              | 3.69 | 3.31 | 3.040 | 9.740  | 16.400 |
| 3.26  | 3.460              | 3.65 | 3.27 | 3.010 | 10.050 | 16.850 |
| 3.99  | n.d. <sup>a)</sup> | 3.6  | 3.23 | 3.015 | 10.350 | 17.100 |
| 4.54  | n.d.               | n.d. | 3.22 | 3.010 | 10.020 | 16.950 |
| 5.45  | n.d.               | n.d. | 3.21 | 3.000 | 9.570  | 15.930 |
| 6.02  | n.d.               | n.d. | 3.22 | 2.930 | 9.080  | 15.970 |
| 6.61  | n.d.               | 3.68 | 3.21 | 2.865 | 8.440  | 15.970 |
| 8.05  | n.d.               | 3.71 | 3.20 | 2.840 | 7.570  | 15.410 |
| 9.77  | n.d.               | 3.72 | 3.20 | 2.815 | 7.330  | 15.290 |
| 10.58 | n.d.               | 3.7  | 3.20 | 2.735 | 7.310  | 15.290 |

<sup>a)</sup>not detected.

$c_{\text{Zn}^{2+}} = 2.5 \text{ mmol dm}^{-3}$ ,  $c_{\text{L}} = 5 \text{ mmol dm}^{-3}$  in  $\text{NaCl}_{(\text{aq})}$  at  $I = 0.1 \text{ mol dm}^{-3}$  and  $T = 298.15 \text{ K}$ .

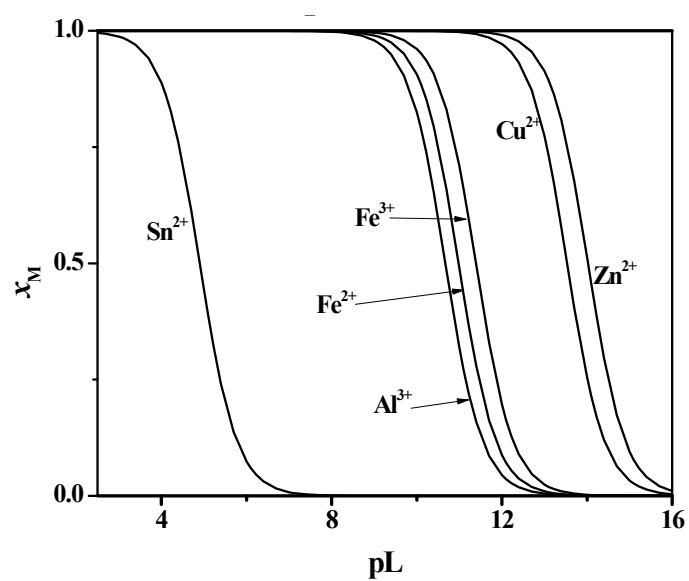

**Figure S1.** Sequestration diagrams of the investigated metal cations by DTPMP, in  $\text{NaCl}_{(\text{aq})}$  at  $I = 0.1 \text{ mol dm}^{-3}$  and  $T = 298.15 \text{ K}$ , at  $\text{pH} = 8.1$ .

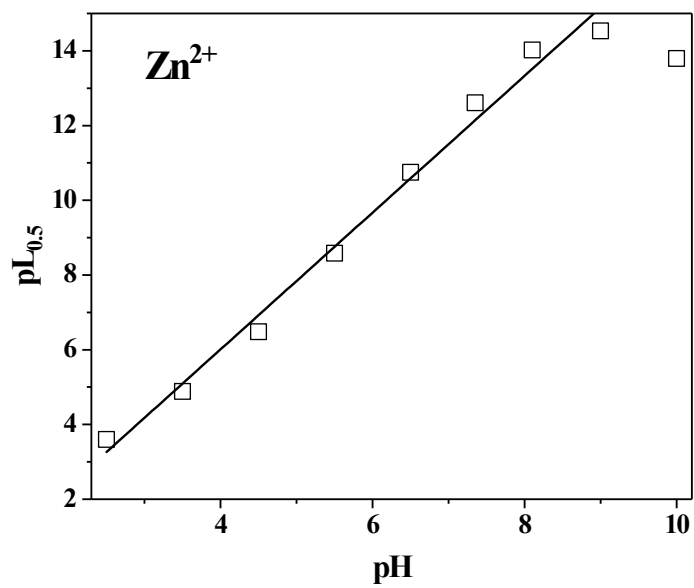

**Figure S2.** Dependence on pH of the sequestering ability (as pL<sub>0.5</sub>) of DTPMP toward Zn<sup>2+</sup>, in NaCl<sub>(aq)</sub> at  $I = 0.1 \text{ mol dm}^{-3}$  and  $T = 298.15 \text{ K}$ .

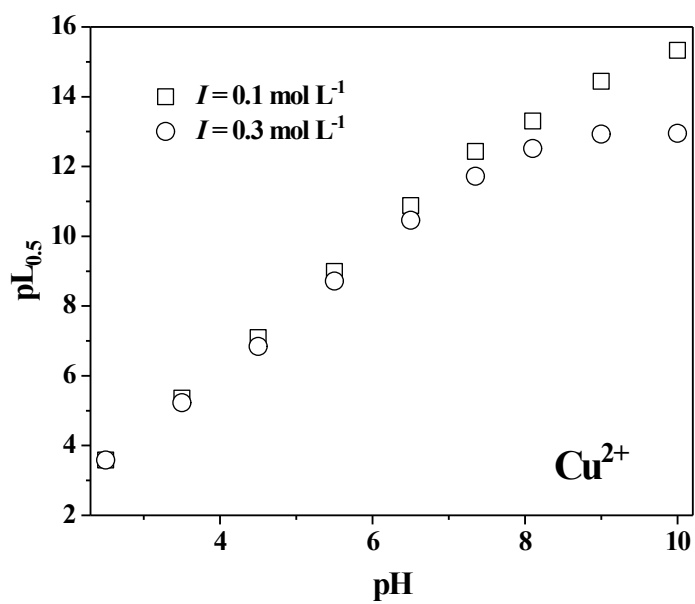

**Figure S3.** Dependence on pH of the sequestering ability (as  $pL_{0.5}$ ) of DTPMP toward  $\text{Cu}^{2+}$ , in  $\text{NaCl}_{(\text{aq})}$  at  $I = 0.1$  and  $0.3 \text{ mol dm}^{-3}$  and  $T = 298.15 \text{ K}$ .

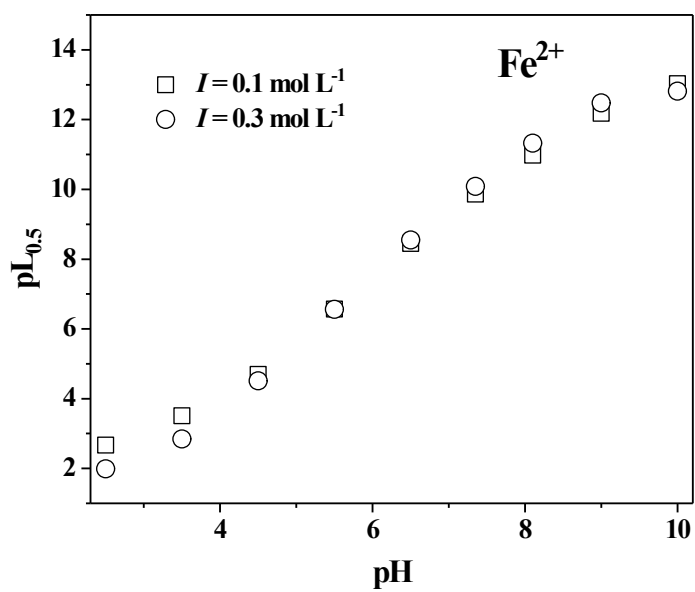

**Figure S4.** Dependence on pH of the sequestering ability (as  $pL_{0.5}$ ) of DTPMP toward  $\text{Fe}^{2+}$ , in  $\text{NaCl}_{(\text{aq})}$  at  $I = 0.1$  and  $0.3 \text{ mol dm}^{-3}$  and  $T = 298.15 \text{ K}$ .

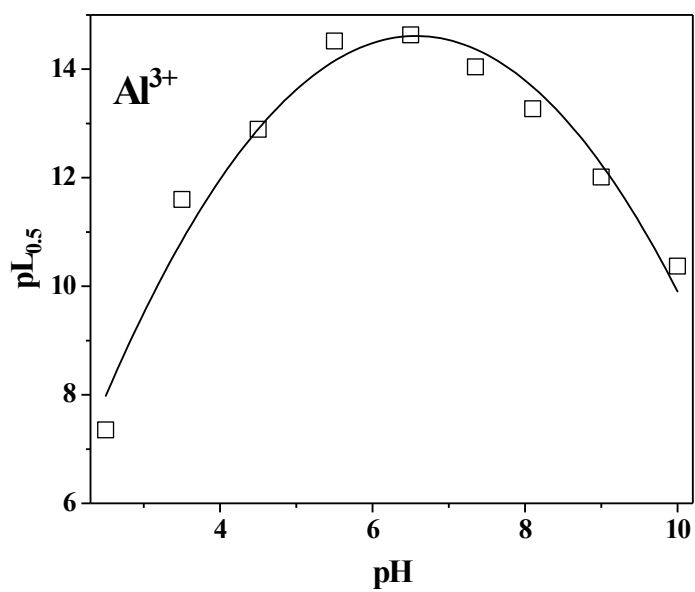

**Figure S5.** Dependence on pH of the sequestering ability (as  $pL_{0.5}$ ) of DTPMP toward  $Al^{3+}$ , in  $NaCl_{(aq)}$  at  $I = 0.1 \text{ mol dm}^{-3}$  and  $T = 298.15 \text{ K}$ .

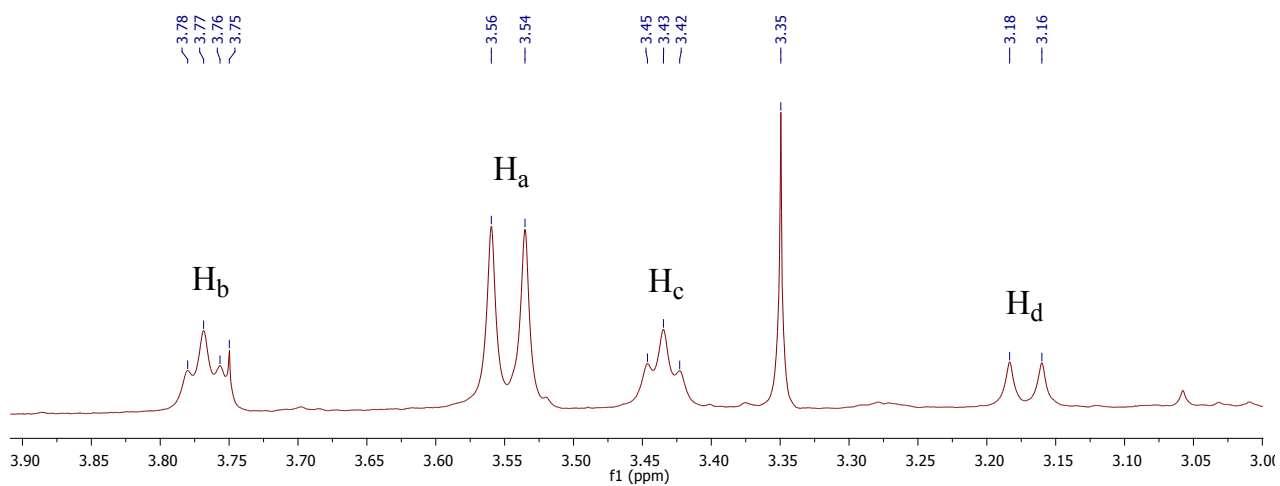

**Figure S6.**  $^1\text{H-NMR}$  (500 MHz) spectrum of DTPMP, in  $\text{NaCl}_{(\text{aq})}$  at  $I = 0.1 \text{ mol dm}^{-3}$  and  $T = 298.15 \text{ K}$ .



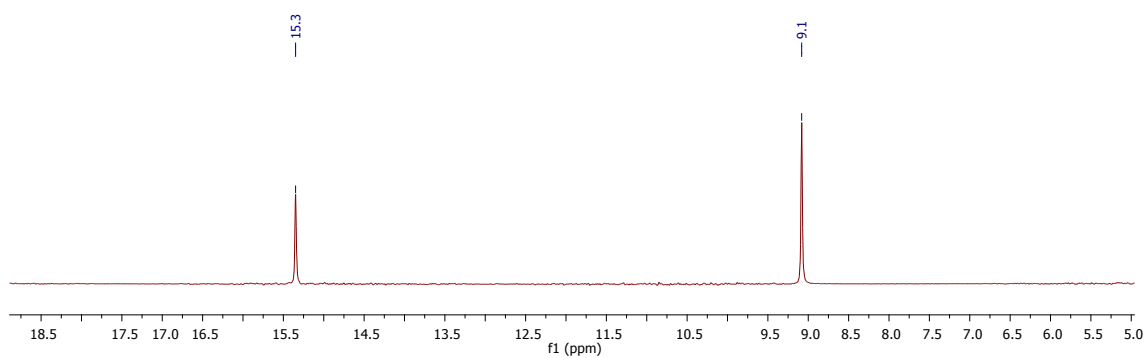

**Figure S7.**  $^{31}\text{P}$ -NMR (202.4 MHz) spectrum of DTPMP, in  $\text{NaCl}_{(\text{aq})}$  at  $I = 0.1 \text{ mol dm}^{-3}$  and  $T = 298.15 \text{ K}$ .

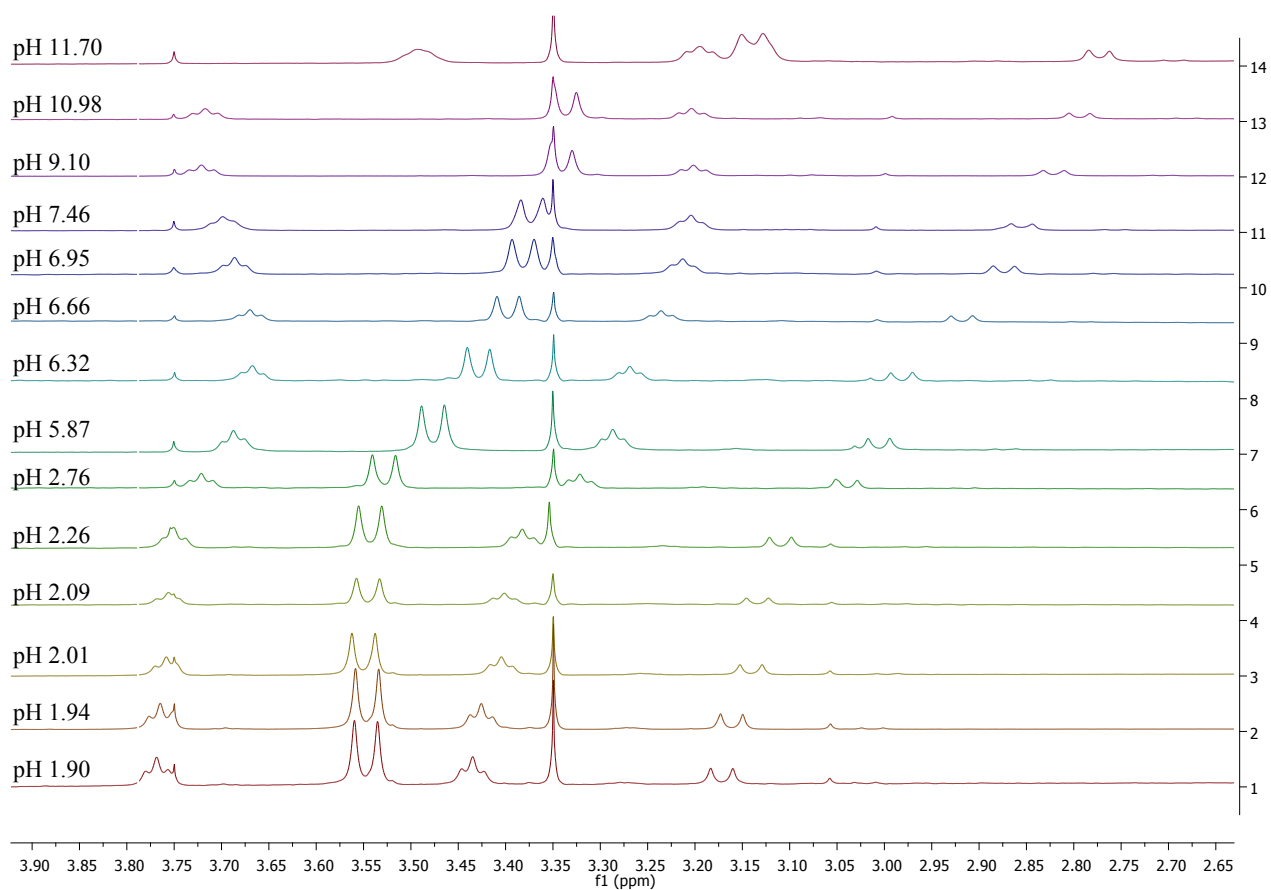

**Figure S8.** Superimposed  $^1\text{H-NMR}$  (500 MHz) spectra of DTPMP at different pHs (increasing from down to top), in  $\text{NaCl}_{(\text{aq})}$  at  $I = 0.1 \text{ mol dm}^{-3}$  and  $T = 298.15 \text{ K}$ .  $c_L = 5.0 \text{ mmol dm}^{-3}$ .

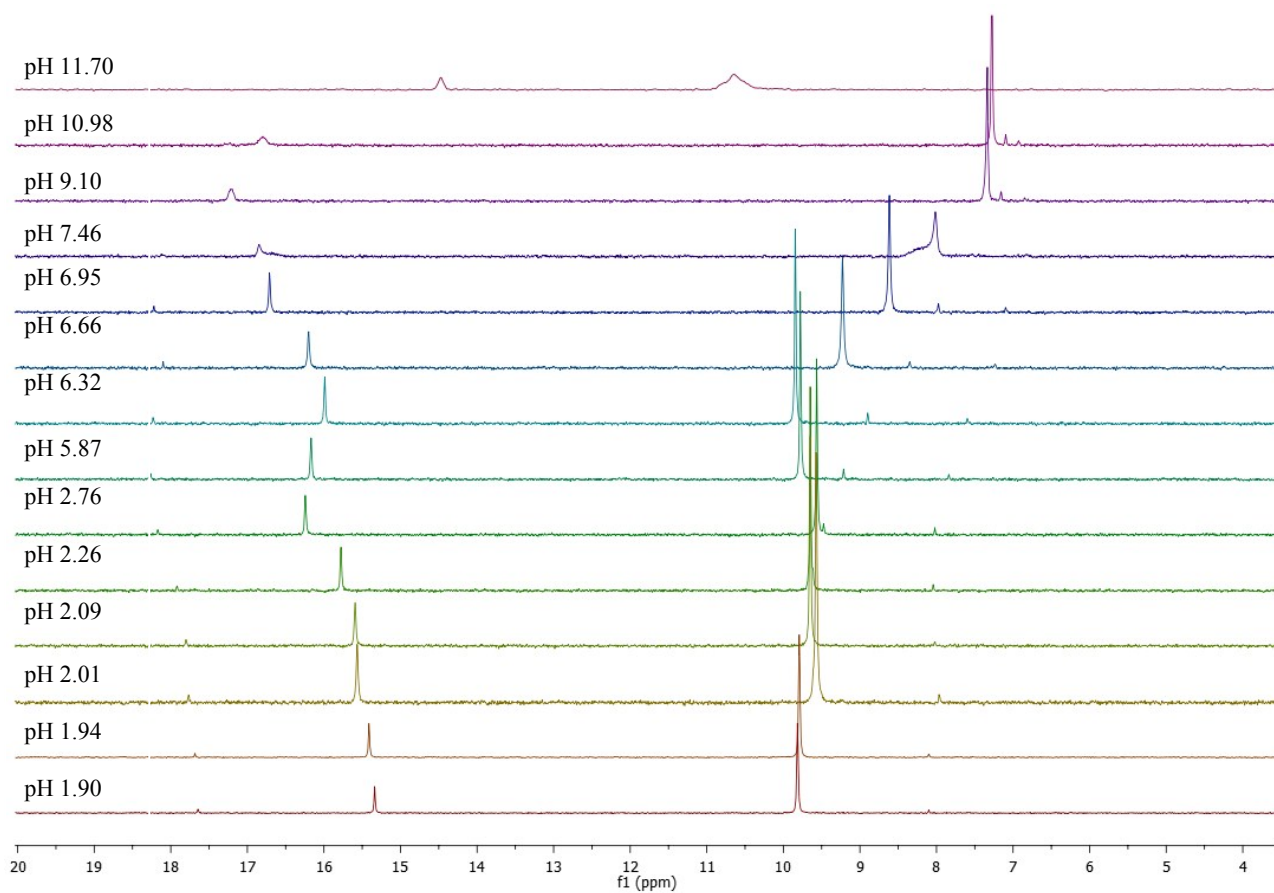

**Figure S9.** Superimposed <sup>31</sup>P-NMR (202.4 MHz) spectra of DTPMP at different pHs (increasing from down to top), in NaCl<sub>(aq)</sub> at  $I = 0.1 \text{ mol dm}^{-3}$  and  $T = 298.15 \text{ K}$ .  $c_L = 5.0 \text{ mmol dm}^{-3}$ .

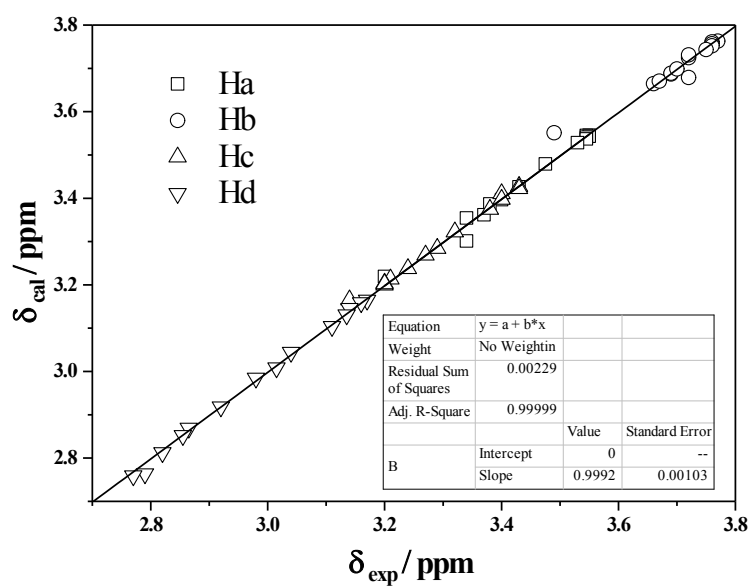

**Figure S10.** Calculated vs. experimental chemical shifts  $^1\text{H-NMR}$  (500 MHz) of Ha, Hb, Hc, and Hd of DTPMP. Conditions:  $c_{\text{DTPMP}} = 0.00510 \text{ mol dm}^{-3}$ , in  $\text{NaCl}_{(\text{aq})}$  at  $I = 0.100 \text{ mol dm}^{-3}$  and  $T = 298.15 \text{ K}$ .

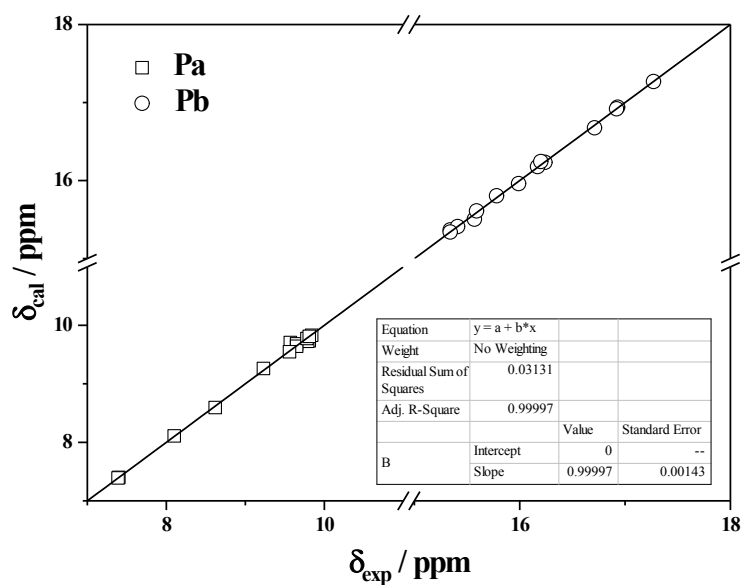

**Figure S11.** Calculated vs. experimental chemical shifts  $^{31}\text{P}$ -NMR (202.4 MHz) of Pa and Pb of DTPMP. Conditions:  $c_{\text{DTPMP}} = 0.00510 \text{ mol dm}^{-3}$ , in  $\text{NaCl}_{(\text{aq})}$  at  $I = 0.100 \text{ mol dm}^{-3}$  and  $T = 298.15 \text{ K}$ .

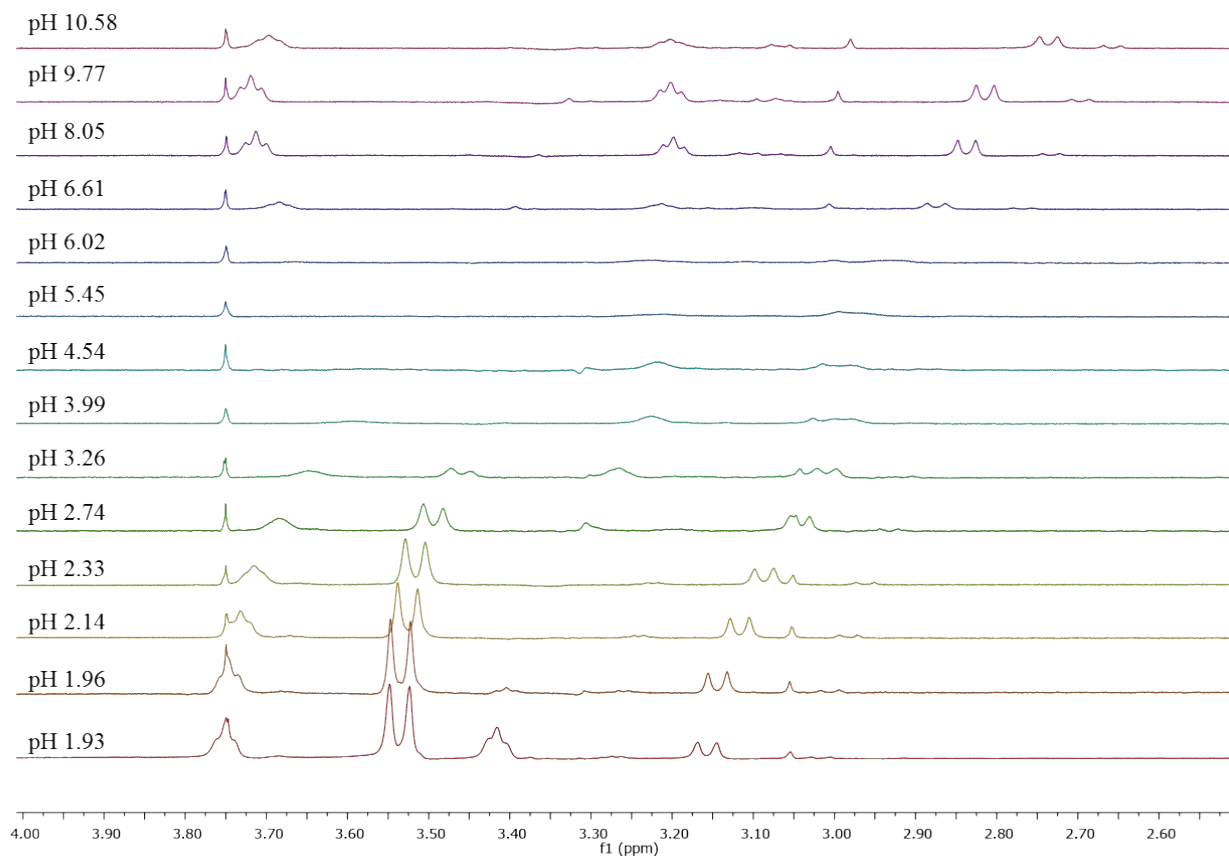

**Figure S12.** Superimposed  $^1\text{H}$ -NMR (500 MHz) spectra of  $\text{Zn}^{2+}/\text{DTPMP}$  solutions at different pHs (increasing from down to top), in  $\text{NaCl}_{(\text{aq})}$  at  $I = 0.1 \text{ mol dm}^{-3}$  and  $T = 298.15 \text{ K}$ .  $c_L = 5.0 \text{ mmol dm}^{-3}$ ;  $c_M = 2.5 \text{ mmol dm}^{-3}$ .

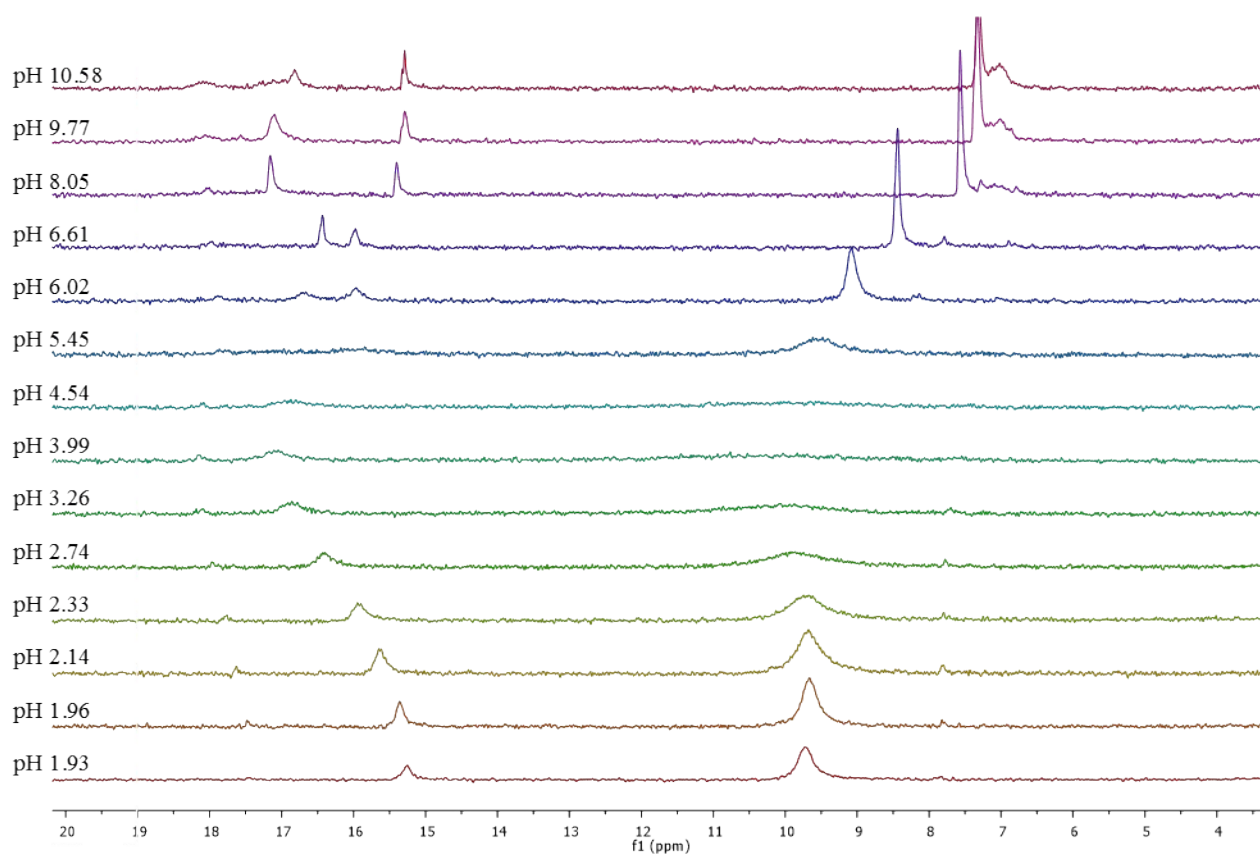

**Figure S13.** Superimposed <sup>31</sup>P-NMR (202.4 MHz) spectra of Zn<sup>2+</sup>/ DTPMP solutions at different pHs (increasing from down to top), in NaCl<sub>(aq)</sub> at  $I = 0.1 \text{ mol dm}^{-3}$  and  $T = 298.15 \text{ K}$ .  $c_L = 5.0 \text{ mmol dm}^{-3}$ ;  $c_M = 2.5 \text{ mmol dm}^{-3}$ .

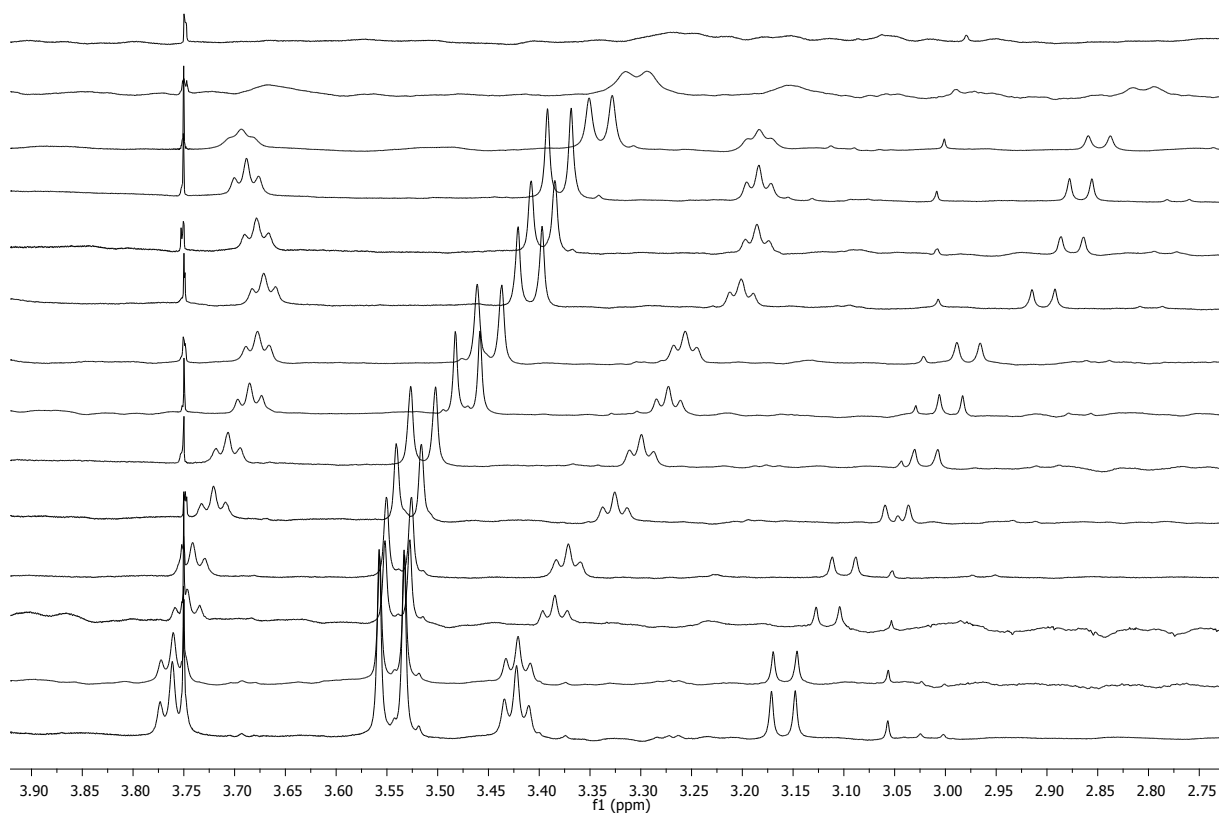

**Figure S14.** Superimposed  $^1\text{H-NMR}$  (500 MHz) spectra of  $\text{Ca}^{2+}/\text{DTPMP}$  solutions at different pHs (increasing from down to top), in  $\text{NaCl}_{(\text{aq})}$  at  $I = 0.1 \text{ mol dm}^{-3}$  and  $T = 298.15 \text{ K}$ .  $c_L = 5.0 \text{ mmol dm}^{-3}$ ;  $c_M = 2.5 \text{ mmol dm}^{-3}$ .



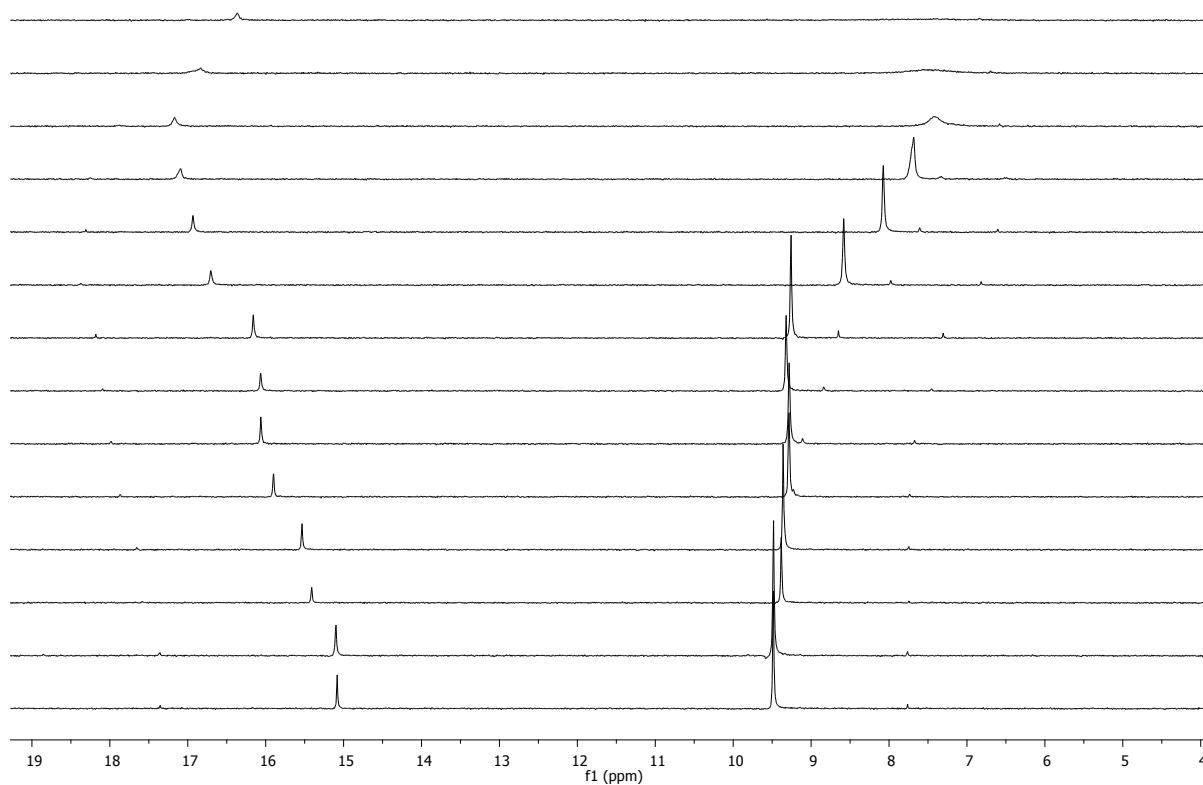

**Figure S15.** Superimposed <sup>31</sup>P-NMR (202.4 MHz) spectra of Ca<sup>2+</sup>/ DTPMP solutions at different pHs (increasing from down to top), in NaCl<sub>(aq)</sub> at  $I = 0.1 \text{ mol dm}^{-3}$  and  $T = 298.15 \text{ K}$ .  $c_L = 5.0 \text{ mmol dm}^{-3}$ ;  $c_M = 2.5 \text{ mmol dm}^{-3}$ .
